# Supplementary material
Source: PubMed Central journal article supplement (PMC1904351)
Supplement: pgen.0030087.sg001.pdf [file pgen.0030087.sg001.pdf]

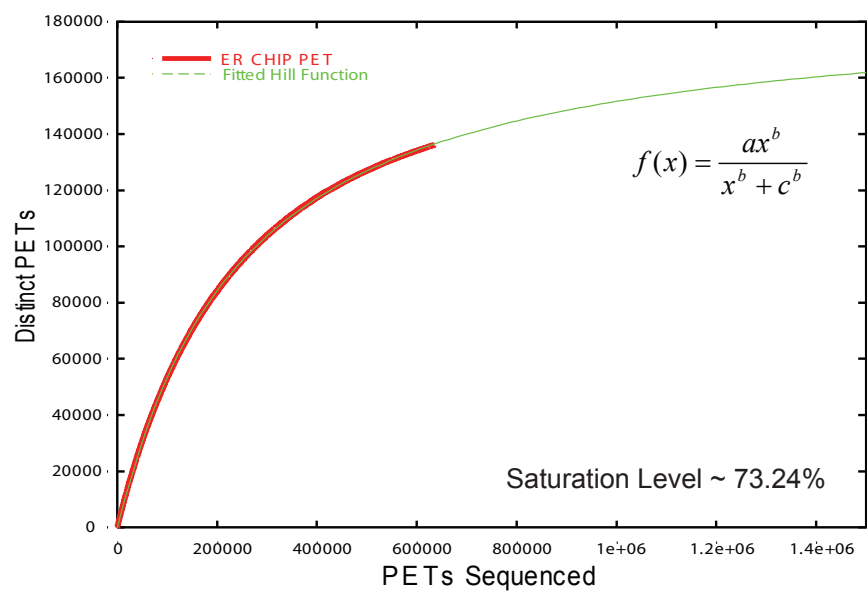

Figure S1. The number of PETs sequenced in this study represent a saturation level of 73.24%. This estimate is based on comparisons of actual sequencing results (red line) to a fitted Hill Function (green curve). The function is shown adjacent to the curves.
