# Supplementary material
Source: PubMed Central journal article supplement (PMC1904351)
Supplement: pgen.0030087.sg002.pdf [file pgen.0030087.sg002.pdf]

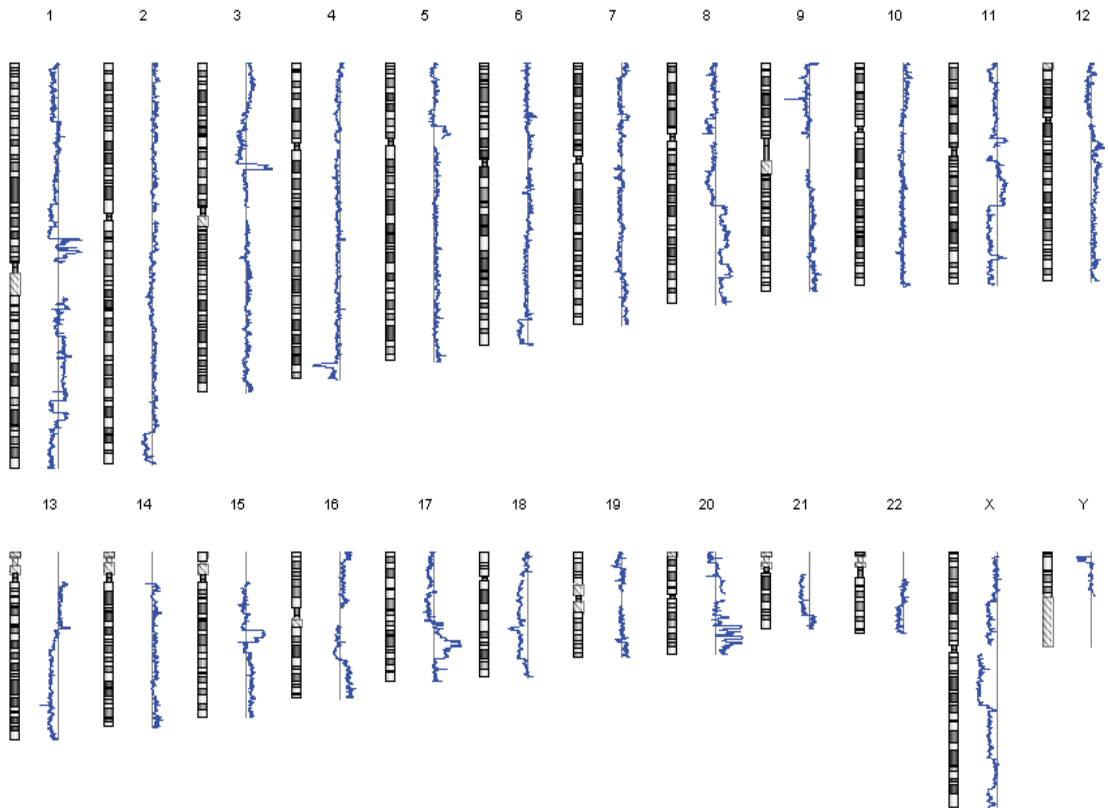

Figure S2. Comparative genome hybridization (CGH) reveals amplified regions in the MCF-7 breast cancer cell line genome.
